# Supplementary material
Source: PubMed Central journal article supplement (PMC3509364)
Supplement: NIHMS416181-supplement-Supporting_Information.pdf [file NIHMS416181-supplement-Supporting_Information.pdf]

Supporting Information

© Wiley-VCH 2012

69451 Weinheim, Germany

**The Art of Filling Protein Pockets Efficiently with Octahedral Metal Complexes\*\***

*Sebastian Blanck, Jasna Maksimoska, Julia Baumeister, Klaus Harms, Ronen Marmorstein,\* and Eric Meggers\**

anie\_201108865\_sm\_miscellaneous\_information.pdf

## Content:

- I.) Synthesis
- II.) Proof of Purity of Complex **1**
- III.) Single Crystal X-Ray Diffraction Study with **1Bn**
- IV.) Protein Crystallography
- V.) Determination of IC<sub>50</sub>-Values
- VI.) Supplementary Kinase Selectivity Data

# I.) Synthesis

## General methods:

All reactions were carried out using oven-dried glassware and conducted under a positive pressure of nitrogen unless specified otherwise. Chemicals were used as received from standard suppliers. 4-Bromophthalic anhydride,<sup>[1]</sup> 4-bromophthalimide,<sup>[1]</sup> TBS-methoxyethene,<sup>[2]</sup> 2-(trimethylstannyl)pyridine,<sup>[3]</sup>  $[\text{Pd}(\text{PPh}_3)_4]$ ,<sup>[4]</sup> and  $[\text{Ru}(\text{MeCN})_3([\text{9}]\text{aneS}_3)]$   $(\text{CF}_3\text{SO}_3)_2$ <sup>[5]</sup> were prepared according to literature procedures. All solvents were distilled prior to use. Acetonitrile and DMF were dried by common methods and freshly distilled prior to use. NMR spectra were recorded on an Avance 300 (300 MHz), Avance 500 (500 MHz), or DPX-250 (250 MHz) spectrometer. Infrared spectra were recorded on a Bruker Alpha FTIR. High resolution mass spectra were obtained with a Finnigan LTQ-FT instrument using either APCI or ESI.

## Synthesis of ruthenium complex 1:

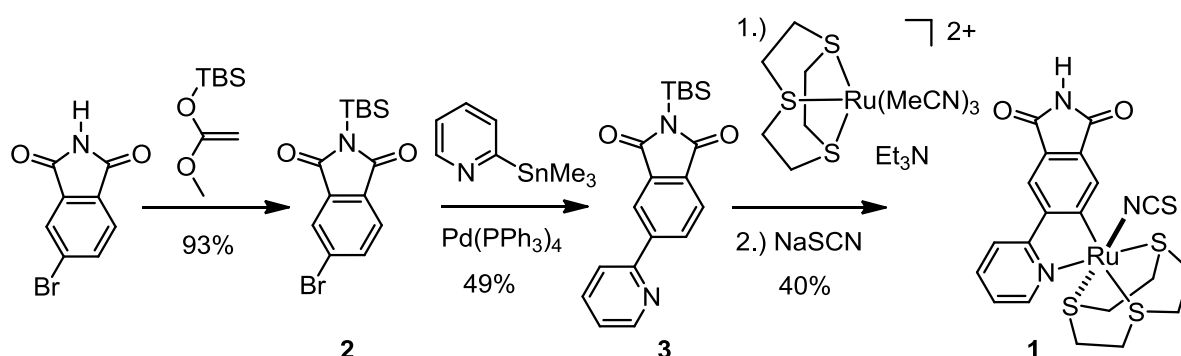

**Scheme S1.** Synthesis of racemic ruthenium complex 1.

*N*-(*tert*-Butyldimethylsilyl)-4-bromophthalimide (2). 4-Bromophthalimide (4.00 g, 17.7 mmol) was suspended in 100 mL acetonitrile, TBS-methoxyethene (6.16 mL, 28.3 mmol) was added and the suspension heated to reflux for 5 h. The solvent was removed and the crude product subjected to silica gel chromatography with  $\text{CH}_2\text{Cl}_2$ . The combined

product eluents were dried *in vacuo* and *N*-(*tert*-butyldimethylsilyl)-4-bromophthalimide (**2**) was obtained as white solid (5.59 g, 93%). <sup>1</sup>H-NMR (300 MHz, CDCl<sub>3</sub>): δ (ppm) 7.93 (d, *J* = 0.9 Hz, 1H), 7.83 (dd, *J* = 8.1, 0.9 Hz, 1H), 7.67 (d, *J* = 8.1 Hz, 1H) 0.97 (s, 9H), 0.51 (s, 6H). <sup>13</sup>C-NMR (75 MHz, CDCl<sub>3</sub>): δ (ppm) = 172.8, 172.3, 136.9, 135.7, 132.6, 128.8, 126.4, 124.4, 26.3, 19.0, -4.3. IR (film) ν (cm<sup>-1</sup>) 2955, 2932, 2857, 1757, 1700, 1599, 1464, 1414, 1331, 1293, 1255, 1167, 1068, 885, 834, 792, 746, 705, 672. HRMS calcd for C<sub>14</sub>H<sub>19</sub>BrNO<sub>2</sub>Si (M+H)<sup>+</sup> 340.0363, found 340.0365.

***N*-(*tert*-Butyldimethylsilyl)-4-(pyridin-2-yl)phthalimide (3).** *N*-(*tert*-Butyldimethylsilyl)-4-bromophthalimide (**2**) (1.10 g, 2.98 mmol) and 2-(trimethylstannyl)pyridine (0.74 g, 3.06 mmol) were dissolved in 10 mL *m*-xylene and the solution was purged with nitrogen for 20 minutes. Tetrakis(triphenylphosphine)palladium(0) (40 mg, 35 μmol) was added and the solution was heated to reflux under nitrogen for 48 h. The solution was cooled to ambient temperature, water (50 mL) was added, the organic phase was separated and the aqueous phase was extracted with CH<sub>2</sub>Cl<sub>2</sub> twice. The combined organic layers were washed with brine, dried using Na<sub>2</sub>SO<sub>4</sub>, filtered and the solvent removed *in vacuo*. The crude product was subjected to silica gel chromatography with first CH<sub>2</sub>Cl<sub>2</sub> and then CH<sub>2</sub>Cl<sub>2</sub>-MeOH (50:1). The combined product eluents were dried *in vacuo* and *N*-(*tert*-butyldimethylsilyl)-4-(pyridin-2-yl)phthalimide (**3**) was obtained as light yellow solid (490 mg, 49%). <sup>1</sup>H-NMR (300 MHz, CDCl<sub>3</sub>): δ (ppm) 8.75 (dt, *J* = 4.8, 1.3 Hz, 1H), 8.43 (dd, *J* = 7.8, 1.5 Hz, 1H), 8.37-8.38 (m, 1H), 7.90 (dd, *J* = 7.8, 0.6 Hz, 1H), 7.81-7.84 (m, 2H), 7.31-7.35 (m, 1H), 1.00 (s, 9H), 0.55 (s, 6H). <sup>13</sup>C-NMR (75 MHz, CDCl<sub>3</sub>): δ (ppm) = 173.71, 173.67, 155.5, 150.3, 145.4, 137.3, 135.0, 134.1, 132.8, 123.6, 123.5, 121.5, 121.2, 26.5, 19.2, -4.1. IR (film) ν (cm<sup>-1</sup>) 2951, 2926, 2880, 2854, 1759, 1693, 1620, 1585, 1465, 1418, 1350, 1296, 1249, 1155, 1057, 849, 838, 787, 746, 673. HRMS calcd for C<sub>19</sub>H<sub>23</sub>N<sub>2</sub>O<sub>2</sub>Si (M+H)<sup>+</sup> 339.1523, found 339.1516.

**Ruthenium complex 1.** *N*-(*tert*-Butyldimethylsilyl)-4-(pyridin-2-yl)phthalimide (**3**) (50 mg, 151  $\mu$ mol) and [Ru(MeCN)<sub>3</sub>([9]aneS<sub>3</sub>)](CF<sub>3</sub>SO<sub>3</sub>)<sub>2</sub> (156 mg, 222  $\mu$ mol) were dissolved in 5 mL DMF and purged with nitrogen for 15 minutes. Triethylamine (26.8  $\mu$ L, 192  $\mu$ mol) was added and the solution was heated to 90 °C for 16 h. NaSCN (18 mg, 222  $\mu$ mol) in water (300  $\mu$ L) was added and the solution was further heated for 3 h to 90 °C. The solvent was removed *in vacuo* and the crude product subjected to silica gel chromatography with CH<sub>2</sub>Cl<sub>2</sub>-MeOH (35:1 to 10:1). The combined product eluents were dried *in vacuo* and the N-bound isomer was obtained as a red solid (35 mg, 40%). The S-bound isomer was obtained as a purple solid (7 mg, 8%).

N-bound isomer: <sup>1</sup>H-NMR (300 MHz, DMSO-*d*<sub>6</sub>):  $\delta$  (ppm) 10.88 (s, 1H), 8.79 (d, *J* = 5.1 Hz, 1H), 8.42 (d, *J* = 8.1 Hz, 1H), 8.20 (s, 1H), 8.18 (s, 1H), 7.91 (t, *J* = 7.2 Hz, 1H), 7.33 (t, *J* = 6.3 Hz, 1H), 2.79-3.02 (m, 4H), 2.42-2.68 (m, 7H), 2.01-2.10 (m, 1H). <sup>13</sup>C-NMR (75 MHz, DMSO-*d*<sub>6</sub>):  $\delta$  (ppm) = 201.5, 170.9, 170.2, 164.4, 152.8, 151.3, 136.8, 132.5, 132.1, 130.1, 125.2, 123.7, 120.2, 116.5, 34.7, 34.5, 33.5, 30.9, 30.4, 27.8. IR (film)  $\nu$  (cm<sup>-1</sup>) 2961, 2922, 2099, 1752, 1706, 1591, 1558, 1474, 1339, 1305, 1210, 1128, 1035, 820, 790, 722. HRMS calcd for C<sub>20</sub>H<sub>19</sub>N<sub>3</sub>O<sub>2</sub>RuS<sub>4</sub>Na (M+Na)<sup>+</sup> 585.9297, found 585.9296.

S-bound isomer: <sup>1</sup>H-NMR (300 MHz, DMSO-*d*<sub>6</sub>):  $\delta$  (ppm) 10.85 (s, 1H), 8.72 (dd, *J* = 5.7, 0.9 Hz, 1H), 8.39 (d, *J* = 8.1 Hz, 1H), 8.17 (s, 1H), 8.08 (s, 1H), 7.84-7.90 (m, 1H), 7.30 (ddd, *J* = 7.5, 5.7, 1.2 Hz, 1H), 2.62-2.93 (m, 11H), 2.07-2.14 (m, 1H). HRMS calcd for C<sub>20</sub>H<sub>19</sub>N<sub>3</sub>O<sub>2</sub>RuS<sub>4</sub>Na (M+Na)<sup>+</sup> 585.9297, found 585.9293.

### Synthesis of ligand **4** and the ruthenium complexes **5-7**:

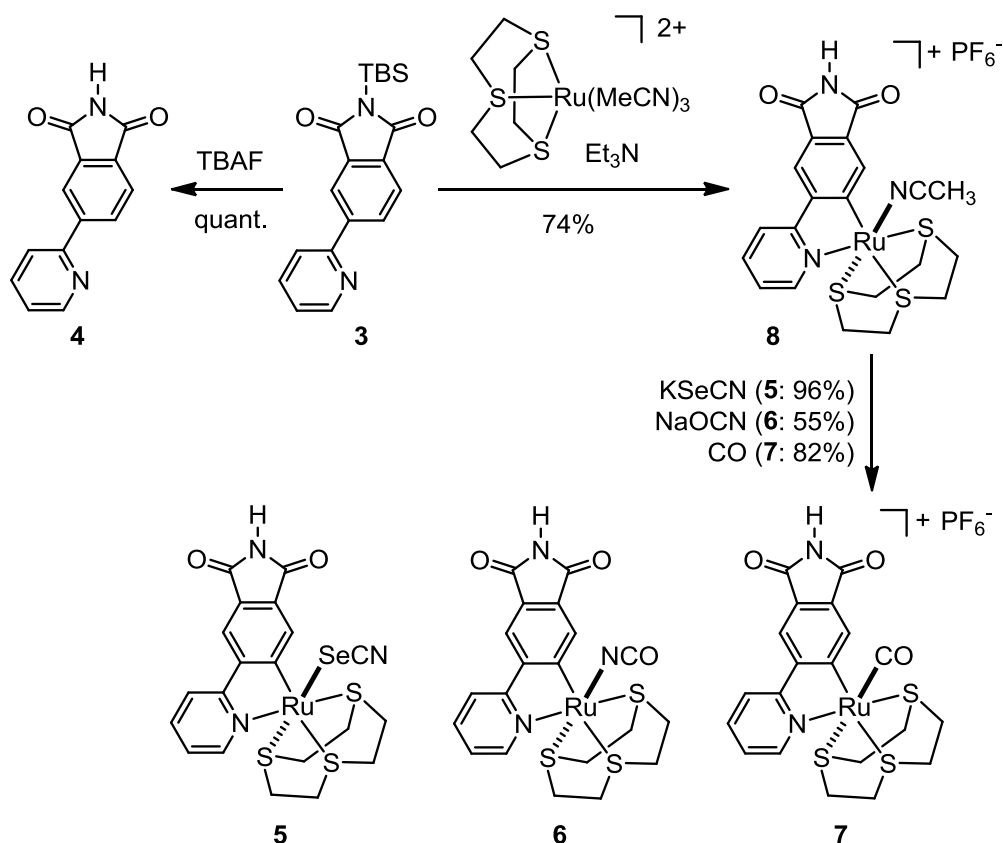

**Scheme S2.** Synthesis of 4-(pyridin-2-yl)phthalimide (**4**) and the racemic ruthenium complexes **5-7**.

**4-(Pyridin-2-yl)phthalimide (4).** *N*-(*tert*-Butyldimethylsilyl)-4-(pyridin-2-yl)phthalimide (**3**) (30 mg, 89  $\mu$ mol) was dissolved in CH<sub>2</sub>Cl<sub>2</sub>, TBAF (1 M in hexane, 106  $\mu$ L, 106  $\mu$ mol) was added and the solution was stirred at room temperature for 5 minutes. The solvent was removed and the crude product subjected to silica gel chromatography with CH<sub>2</sub>Cl<sub>2</sub>-MeOH (35:1). The combined product eluents were dried *in vacuo* to provide 4-(pyridin-2-yl)phthalimide (**4**) as a white solid (20 mg, quant.). <sup>1</sup>H-NMR (300 MHz, DMSO-*d*<sub>6</sub>):  $\delta$  (ppm) 11.43 (s, 1H), 8.74 (ddd, *J* = 4.8, 1.8, 0.9 Hz, 1H), 8.54 (dd, *J* = 7.9, 1.5 Hz, 1H), 8.47 (dd, *J* = 1.5, 0.6 Hz, 1H), 8.19 (dt, *J* = 8.0, 0.9 Hz, 1H), 7.98 (td, *J* = 7.7, 1.8 Hz, 1H), 7.93 (dd, *J* = 7.8, 0.6 Hz, 1H), 7.47 (ddd, *J* = 7.5, 4.8, 1.0 Hz, 1H). <sup>13</sup>C-NMR (63 MHz,

DMSO-*d*<sub>6</sub>):  $\delta$  (ppm) = 168.94, 168.91, 153.9, 149.8, 144.3, 137.6, 133.5, 132.6, 132.2, 123.9, 123.4, 121.3, 120.6. IR (film)  $\nu$  (cm<sup>-1</sup>) 2926, 2722, 1717, 1655, 1587, 1430, 1351, 1303, 1177, 1141, 1102, 1059, 996, 833, 783, 737, 687, 634. HRMS calcd for C<sub>13</sub>H<sub>9</sub>N<sub>2</sub>O<sub>2</sub> (M+H)<sup>+</sup> 225.0659, found 225.0659.

**Ruthenium complex 8.** *N*-(*tert*-Butyldimethylsilyl)-4-(pyridin-2-yl)phthalimide (**3**) (50 mg, 148  $\mu$ mol) and [Ru(MeCN)<sub>3</sub>([9]aneS<sub>3</sub>)](CF<sub>3</sub>SO<sub>3</sub>)<sub>2</sub> (156 mg, 222  $\mu$ mol) were dissolved in 5 mL DMF and purged with nitrogen for 15 minutes. Triethylamine (26.8  $\mu$ L, 192  $\mu$ mol) was added and the solution was heated to 90 °C for 16 h. The solvent was removed and the crude product subjected to silica gel chromatography with first acetonitrile and then acetonitrile/water/sat. KNO<sub>3</sub> solution (50:3:1). The combined product eluents were dried *in vacuo*, dissolved in a minimal amount of acetonitrile-water and NH<sub>4</sub>PF<sub>6</sub> was added. The solution was centrifuged, the resulting orange filter cake washed three times with water and dried *in vacuo* to provide the monoacetonitrile complex **8** as a light orange solid (75 mg, 74%).  
<sup>1</sup>H-NMR (500 MHz, CD<sub>3</sub>CN):  $\delta$  (ppm) = 8.75 (ddd, *J* = 5.6, 1.5, 0.7 Hz, 1H), 8.60 (s, 1H), 8.28 (s, 1H), 8.24 (d, *J* = 8.1 Hz, 1H), 8.17 (s, 1H), 7.92 (ddd, *J* = 8.1, 6.7, 1.5 Hz, 1H), 7.30 (ddd, *J* = 7.4, 5.6, 1.4 Hz, 1H), 2.92-3.06 (m, 3H), 2.83-2.88 (m, 1H), 2.59-2.74 (m, 3H), 2.45-2.50 (m, 1H), 2.33-2.39 (m, 1H), 2.25-2.31 (m, 2H), 2.10-2.16 (m, 1H). <sup>13</sup>C-NMR (63 MHz, CD<sub>3</sub>CN):  $\delta$  (ppm) 196.0, 169.7, 169.1, 164.4, 152.9, 151.4, 137.2, 132.7, 130.7, 126.5, 123.8, 122.8, 120.3, 116.4, 35.0, 33.9, 33.3, 31.3, 30.2, 27.7, 2.8. IR (film)  $\nu$  (cm<sup>-1</sup>) 3185, 3059, 1755, 1704, 1590, 1476, 1444, 1411, 1339, 1307, 1211, 1131, 1044, 835, 747, 677, 645. HRMS calcd for C<sub>21</sub>H<sub>22</sub>N<sub>3</sub>O<sub>2</sub>RuS<sub>3</sub> (M-PF<sub>6</sub>)<sup>+</sup> 545.9916, found 545.9911.

**Ruthenium complex 5.** Monoacetonitrile complex **8** (13 mg, 19  $\mu$ mol) was dissolved in 3 mL DMF, KeSCN (4 mg, 28  $\mu$ mol) in 300  $\mu$ L water was added and the solution was heated to 90 °C for 5 h. The solvent was removed and the crude product subjected to silica gel

chromatography with CH<sub>2</sub>Cl<sub>2</sub>-MeOH (35:1→10:1). The combined product eluents were dried *in vacuo* to provide the selenocyanate complex **5** as a red solid (11 mg, 96%). <sup>1</sup>H-NMR (500 MHz, DMSO-*d*<sub>6</sub>): δ (ppm) 10.83 (s, 1H), 8.72 (d, *J* = 5.0 Hz, 1H), 8.38 (d, *J* = 8.1 Hz, 1H), 8.17 (s, 1H), 8.08 (s, 1H), 7.84-7.87 (m, 1H), 7.27-7.30 (m, 1H), 2.86-2.93 (m, 2H), 2.75-2.84 (m, 3H), 2.66-2.74 (m, 1H), 2.44-2.54 (m, 5H), 2.06-2.12 (m, 1H). <sup>13</sup>C-NMR (125 MHz, DMSO-*d*<sub>6</sub>): δ (ppm) = 201.8, 171.4, 170.7, 164.6, 153.2, 151.6, 136.7, 132.8, 130.6, 125.6, 124.0, 120.8, 116.9, 108.2, 35.3, 34.7, 33.4, 33.3, 32.4, 28.7. IR (film) ν (cm<sup>-1</sup>) 3121, 3053, 2920, 2719, 2098, 1749, 1708, 1590, 1473, 1442, 1406, 1336, 1304, 1208, 1139, 1039, 1012, 949, 899, 817, 744. HRMS calcd for C<sub>20</sub>H<sub>19</sub>N<sub>3</sub>O<sub>2</sub>RuS<sub>3</sub>SeNa (M+Na)<sup>+</sup> 633.8747, found 633.8734.

**Ruthenium complex 6.** Monoacetonitrile complex **8** (23 mg, 33 μmol) was dissolved in 3 mL DMF, NaOCN (3 mg, 50 μmol) in 300 μL water was added and the solution was heated to 95 °C for 3 h. The solvent was removed and the crude product subjected to silica gel chromatography with CH<sub>2</sub>Cl<sub>2</sub>-MeOH (35:1→10:1). The combined product eluents were dried *in vacuo* to provide the isocyanate complex **6** as a red solid (10 mg, 55%). <sup>1</sup>H-NMR (300 MHz, DMSO-*d*<sub>6</sub>): δ (ppm) 10.82 (s, 1H), 8.80 (dd, *J* = 5.6, 0.8 Hz, 1H), 8.37 (d, *J* = 8.3 Hz, 1H), 8.19 (s, 1H), 8.15 (s, 1H), 7.84-7.90 (m, 1H), 7.27-7.31 (m, 1H), 2.73-2.95 (m, 5H), 2.56-2.64 (m, 3H), 2.34-2.45 (m, 3H), 1.99-2.08 (m, 1H). <sup>13</sup>C-NMR (125 MHz, DMSO-*d*<sub>6</sub>): δ (ppm) = 205.4, 171.6, 170.8, 164.9, 153.1, 151.8, 136.8, 132.9, 130.3, 125.0, 123.9, 120.4, 116.8, 35.4, 34.8, 34.3, 31.2, 30.7, 28.0. IR (film) ν (cm<sup>-1</sup>) 3436, 3154, 3052, 2181, 1751, 1700, 1620, 1587, 1473, 1405, 1338, 1306, 1037, 898, 816, 743. HRMS calcd for C<sub>20</sub>H<sub>19</sub>N<sub>3</sub>O<sub>3</sub>RuS<sub>3</sub>Na (M+Na)<sup>+</sup> 569.9526, found 569.9520.

**Ruthenium complex 7.** Monoacetonitrile complex **8** (15 mg, 22 μmol) was dissolved in 3 mL DMF, purged with CO gas for 30 sec and heated under a CO atmosphere to 95 °C for 3 h. The



solvent was removed and the crude product subjected to silica gel chromatography with first acetonitrile and then acetonitrile/water/sat. KNO<sub>3</sub> solution (50:3:1). The combined product eluents were dried *in vacuo*, dissolved in a minimal amount of acetonitrile-water and NH<sub>4</sub>PF<sub>6</sub> was added. The solution was centrifuged, the resulting orange filter cake washed three times with water and dried *in vacuo* to provide the carbonyl complex **7** as an orange solid (12 mg, 82%). <sup>1</sup>H-NMR (500 MHz, CD<sub>3</sub>CN): δ (ppm) = 8.81 (s, 1H), 8.55 (ddd, *J* = 5.6, 1.5, 0.8 Hz, 1H), 8.34 (dd, *J* = 7.3, 0.7 Hz, 1H), 8.29 (s, 1H), 8.09 (s, 1H), 8.06 (ddd, *J* = 8.1, 7.6, 1.5 Hz, 1H), 7.39 (ddd, *J* = 7.5, 5.6, 1.4 Hz, 1H), 3.29-3.34 (m, 1H), 3.11-3.21 (m, 3H), 2.91-2.96 (m, 1H), 2.82-2.90 (m, 2H), 2.71-2.79 (m, 2H), 2.57-2.64 (m, 2H), 2.39-2.45 (m, 1H). <sup>13</sup>C-NMR (125 MHz, CD<sub>3</sub>CN): δ (ppm) 194.3, 179.6, 169.1, 169.0, 163.9, 153.7, 151.1, 139.3, 132.7, 132.3, 129.3, 125.2, 122.0, 117.9, 36.9, 34.9, 34.8, 33.2, 32.3, 29.8. IR (film) ν (cm<sup>-1</sup>) 3223, 1970, 1765, 1713, 1560, 1480, 1450, 1408, 1343, 1307, 1221, 1171, 1133, 1042, 831, 745, 645. HRMS calcd for C<sub>20</sub>H<sub>19</sub>N<sub>2</sub>O<sub>3</sub>RuS<sub>3</sub> (M-PF<sub>6</sub>)<sup>+</sup> 532.9596, found 532.9606.

### Synthesis of ruthenium complex 1Bn:

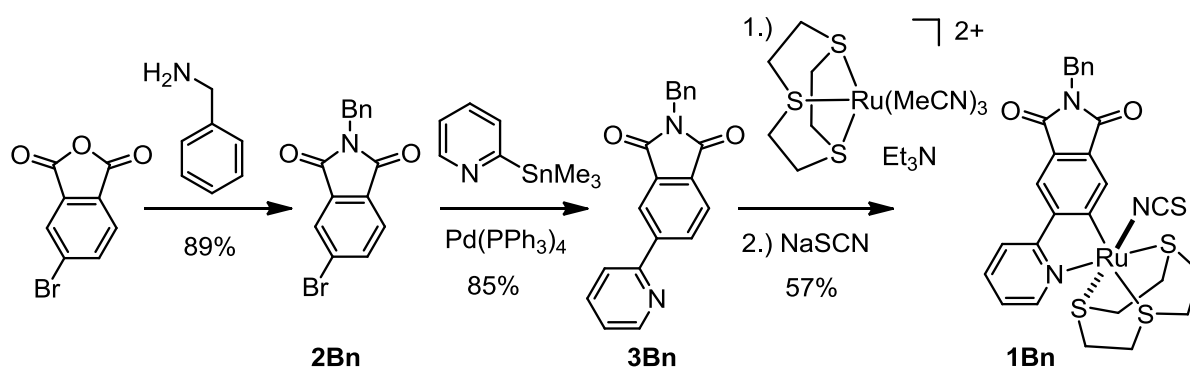

**Scheme S3.** Synthesis of the racemic ruthenium complex **1Bn**.

**N-Benzyl-4-bromophthalimide (2Bn).** 4-Bromophthalic anhydride (5.00 g, 22.0 mmol) was dissolved in 50 mL glacial acetic acid. Benzylamine (2.40 mL, 22.0 mmol) was added and the solution was heated to 130 °C for 4 h. The hot solution was carefully poured into 200 mL ice-

cold water, the resulting solid filtered off, washed with 100 mL water and dried *in vacuo* to provide *N*-benzyl-4-bromophthalimide as a beige solid (6.22 g, 89%). <sup>1</sup>H-NMR (300 MHz, CDCl<sub>3</sub>): δ (ppm) . 7.97 (dd, *J* = 1.6, 0.3 Hz, 1H), 7.84 (dd, *J* = 7.9, 1.7 Hz, 1H), 7.69-7.72 (m, 1H), 7.40-7.43 (m, 2H), 7.27-7.35 (m, 3H), 4.83 (s, 2H). <sup>13</sup>C-NMR (75 MHz, CDCl<sub>3</sub>): 167.2, 166.7, 137.0, 136.0, 133.7, 130.6, 128.9, 128.7, 128.6, 128.0, 126.7, 124.7, 41.8. δ (ppm) =. IR (film) ν (cm<sup>-1</sup>) 3065, 3033, 1772, 1710, 1607, 1430, 1418, 1387, 1345, 1186, 1170, 1102, 1068, 942, 739, 714, 398. HRMS calcd for C<sub>15</sub>H<sub>11</sub>BrNO<sub>2</sub> (M+H)<sup>+</sup> 317.9949, found 317.9950.

***N*-Benzyl-4-(pyridin-2-yl)phthalimide (3Bn).** *N*-Benzyl-4-bromophthalimide (**2Bn**) (1.28 g, 4.04 mmol) and 2-pyridyltrimethylstannane (0.90 g, 3.69 mmol) were dissolved in 35 mL *m*-xylene and the solution was purged with nitrogen for 20 minutes. Tetrakis-(triphenylphosphine)palladium(0) (473 mg, 0.41 mmol) was added and the solution was heated to reflux under nitrogen for 48 h. The solution was cooled to ambient temperature, water (50 mL) was added, the organic phase was separated and the aqueous phase was extracted twice with CH<sub>2</sub>Cl<sub>2</sub>. The combined organic layers were washed with brine, dried using Na<sub>2</sub>SO<sub>4</sub>, filtered and the solvent removed *in vacuo*. The crude product was subjected to silica gel chromatography with first CH<sub>2</sub>Cl<sub>2</sub> then CH<sub>2</sub>Cl<sub>2</sub>-MeOH (75:1). The combined product eluents were dried *in vacuo* and *N*-benzyl-4-(pyridin-2-yl)phthalimide (**3Bn**) was obtained as a light yellow solid (980 mg, 85%). <sup>1</sup>H-NMR (300 MHz, CDCl<sub>3</sub>): δ (ppm) 8.74 (dt, *J* = 4.8, 1.4 Hz, 1H), 8.44-8.45 (m, 1H), 8.41 (dd, *J* = 7.8, 1.5 Hz, 1H), 7.93 (dd, *J* = 7.8, 0.6 Hz, 1H), 7.81-7.83 (m, 2H), 7.44-7.47 (m, 2H), 7.27-7.35 (m, 4H), 4.88 (s, 2H). <sup>13</sup>C-NMR (75 MHz, CDCl<sub>3</sub>): δ (ppm) = 167.8, 155.1, 150.1, 145.3, 137.1, 136.4, 132.9, 132.5, 132.0, 128.7, 128.6, 127.8, 123.8, 123.5, 121.7, 121.0, 41.7. IR (film) ν (cm<sup>-1</sup>) 3029, 2930, 1766, 1699, 1617, 1584, 1422, 1387, 1341, 1304, 1155, 1106, 1067, 949, 786, 740, 695, 623. HRMS calcd for C<sub>20</sub>H<sub>15</sub>N<sub>2</sub>O<sub>2</sub> (M+H)<sup>+</sup> 315.1128, found 315.1124.

**Ruthenium complex 1Bn.** A solution of *N*-benzyl-4-(pyridin-2-yl)phthalimide (**3Bn**) (70.3 mg, 223  $\mu$ mol),  $[\text{Ru}(\text{MeCN})_3([\text{9}]\text{aneS}_3)](\text{CF}_3\text{SO}_3)_2$  (140 mg, 200  $\mu$ mol) and triethylamine (30  $\mu$ L, 223  $\mu$ mol) in 11 mL DMF was heated to 90  $^\circ\text{C}$  for 21 h. Following the addition of NaSCN (30.5 mg, 376  $\mu$ mol) the solution was heated for an additional 1 h to 90  $^\circ\text{C}$ . The solvent was removed *in vacuo* and the crude product subjected to silica gel chromatography with  $\text{CH}_2\text{Cl}_2$ -MeOH (20:1). The combined product eluents were dried *in vacuo* and the N-bound isomer was obtained as a red solid (61 mg, 57%). Small amounts of the purple S-bound isomer were also obtained (15 mg, 12%).

N-bound isomer:  $^1\text{H-NMR}$  (300 MHz,  $\text{DMSO-}d_6$ ):  $\delta$  (ppm) 8.80 (d,  $J = 4.7$  Hz, 1H), 8.45 (d,  $J = 8.1$  Hz, 1H), 8.28 (s, 1H), 8.25 (s, 1H), 7.95-7.89 (m, 1H), 7.38-7.23 (m, 6H), 4.76 (s, 2H), 3.03-2.40 (m, 12H).  $^{13}\text{C-NMR}$  (75 MHz,  $\text{DMSO-}d_6$ ):  $\delta$  (ppm) = 202.7, 169.3, 168.7, 164.3, 152.8, 151.5, 137.2, 136.8, 132.7, 132.20, 132.17, 128.9, 128.5, 127.2, 123.9, 123.8, 120.3, 116.7, 54.9, 34.7, 34.5, 33.6, 30.9, 30.5, 27.8. IR (film)  $\nu$  ( $\text{cm}^{-1}$ ) 2919, 2851, 2107, 2088, 1753, 1694, 1591, 1571, 1555, 1476, 1396, 1380, 1365, 1333, 1271, 1209, 1158, 1108, 1062, 1018, 962, 906, 875, 817, 788, 749, 733, 622, 592. HRMS calcd for  $\text{C}_{27}\text{H}_{25}\text{N}_3\text{O}_2\text{RuS}_4\text{Na}$  ( $\text{M}+\text{Na}$ ) $^+$  675.9765, found 675.9776.

S-bound isomer:  $^1\text{H-NMR}$  (300 MHz,  $\text{DMSO-}d_6$ ):  $\delta$  (ppm) 8.73 (d,  $J = 4.7$  Hz, 1H), 8.42 (d,  $J = 8.1$  Hz, 1H), 8.25 (s, 1H), 8.15 (s, 1H), 7.87 (dt,  $J = 8.1, 1.4$  Hz, 1H), 7.36-7.23 (m, 6H), 4.74 (s, 2H), 2.95-2.54 (m, 10H), 2.06-2.18 (m, 2H). IR (film)  $\nu$  ( $\text{cm}^{-1}$ ) 3425, 3029, 2921, 2088, 1753, 1693, 1592, 1566, 1475, 1381, 1338, 1271, 1204, 1112, 959, 904, 875, 787, 746, 700. HRMS calcd for  $\text{C}_{27}\text{H}_{25}\text{N}_3\text{O}_2\text{RuS}_4\text{Na}$  ( $\text{M}+\text{Na}$ ) $^+$  675.9765, found 675.9774.

## II.) Proof of Purity of Complex 1

Complex **1** was eluted with a normal phase silica gel column (Merck Purospher STAR, LiChroCART 250 x 4.6 mm, Si, 5  $\mu$ m) on an Agilent 1200 Series HPLC system with a quaternary pump. Flow rate: 0.75 mL/min; UV-detection at 470 nm; isocratic: 30 min dichloromethane/methanol 95:5. Result: Purity of complex **1**  $\geq$  98%.

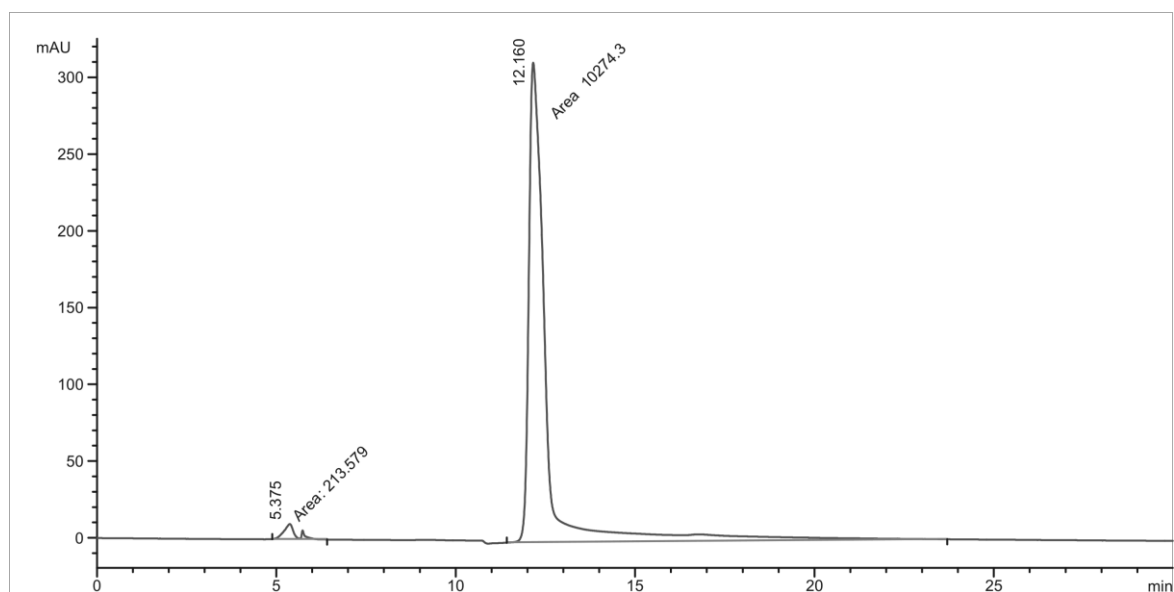

**Figure S1.** HPLC trace of complex **1**.

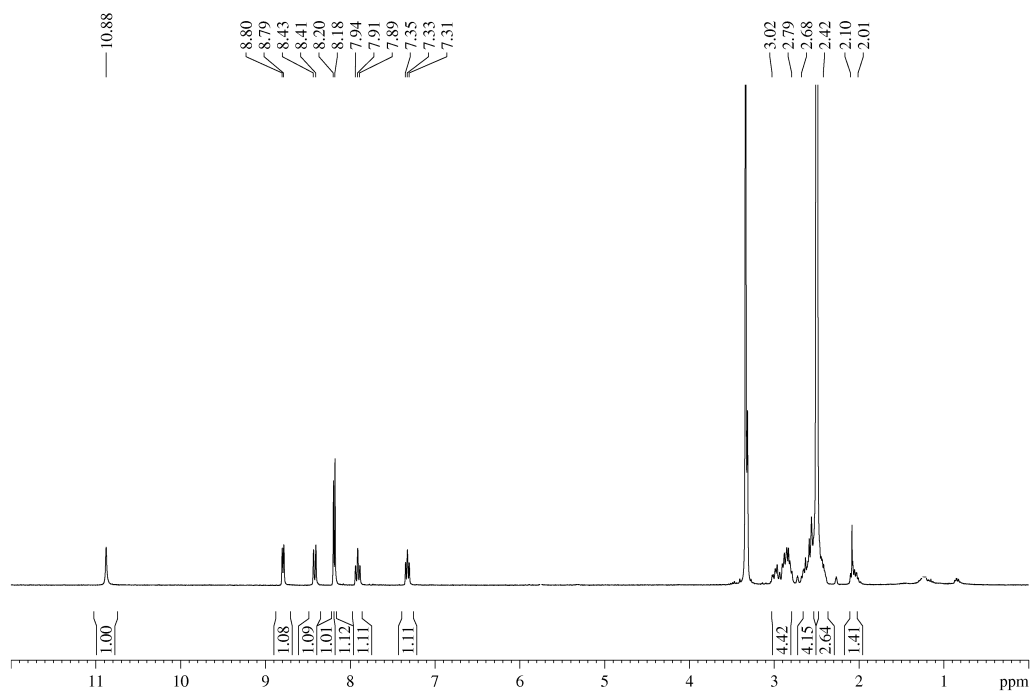

**Figure S2.**  $^1\text{H-NMR}$  of complex **1** (300 MHz,  $\text{DMSO-}d_6$ ).

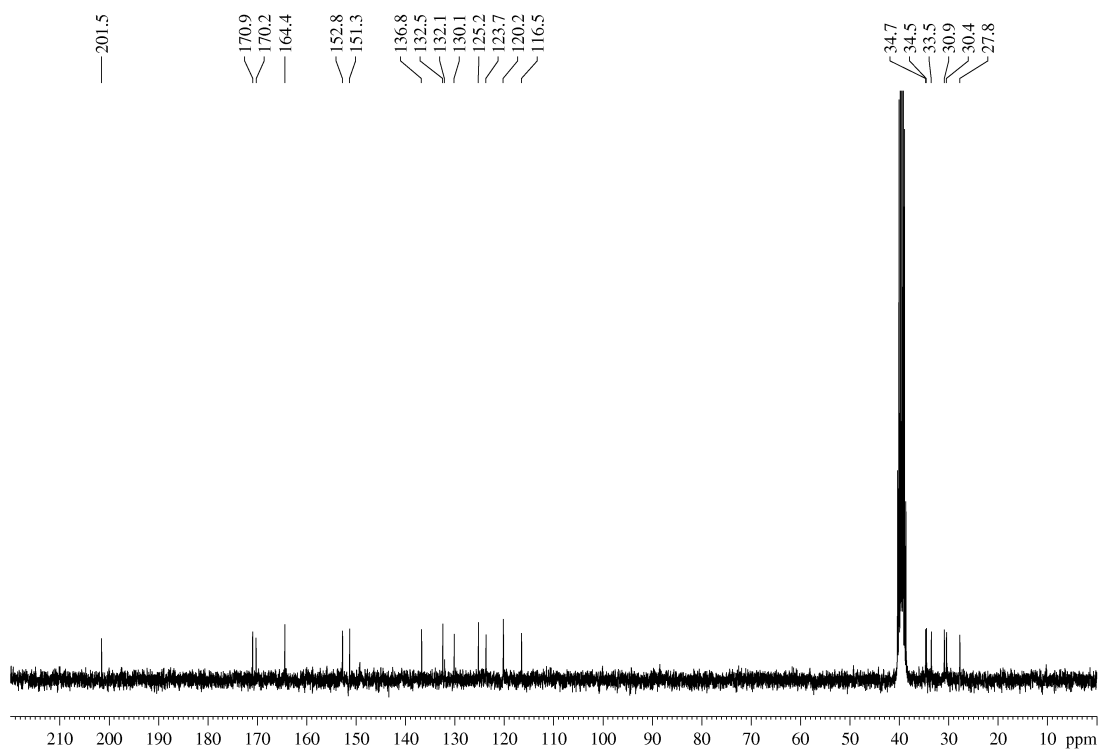

**Figure S3.**  $^{13}\text{C}$ -NMR of complex **1** (75 MHz,  $\text{DMSO-}d_6$ ).

### III.) Single Crystal X-Ray Diffraction Study with **1Bn**

Single crystals of complex **1Bn** were obtained upon slow diffusion of diethylether into dichloromethane at 6 °C. The intensity data were collected at 100 K using a STOE IPDS-2T system. The data were corrected for absorption effects using indexed faces.<sup>[6]</sup> The structure was solved using direct methods (SIR-92)<sup>[7]</sup> and refined using the full matrix least squares procedure implemented in SHELX-97.<sup>[8]</sup> Hydrogen atoms were included at calculated positions.

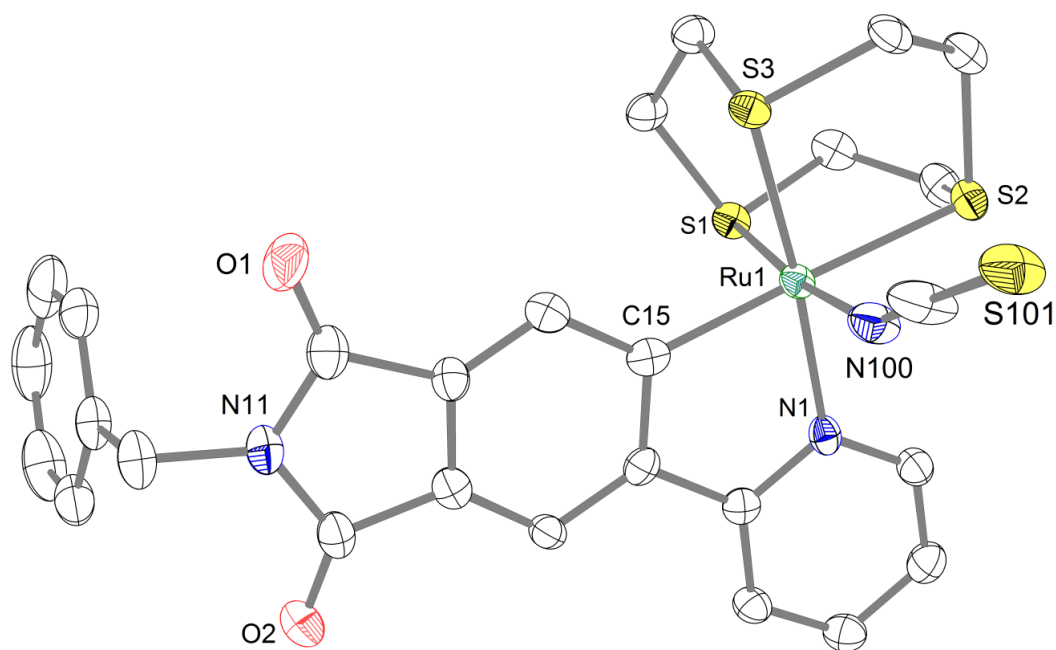

**Figure S4.** Structure of the *N*-benzylated derivative of complex **1** (**1Bn**). Disordered solvent and a disordered position of S101 are not shown. ORTEP drawing with 50% probability thermal ellipsoids.

**Table S1.** Crystallographic data for complex **1Bn**.<sup>a</sup>

|                                         | <b>1Bn</b>                                                                                     |
|-----------------------------------------|------------------------------------------------------------------------------------------------|
| formula                                 | C <sub>28</sub> H <sub>27</sub> Cl <sub>2</sub> N <sub>3</sub> O <sub>2</sub> RuS <sub>4</sub> |
| fw                                      | 737.74                                                                                         |
| a(Å)                                    | 14.6619(6)                                                                                     |
| b(Å)                                    | 13.2660(4)                                                                                     |
| c(Å)                                    | 15.5860(7)                                                                                     |
| α(°)                                    | 90                                                                                             |
| β(°)                                    | 98.519(4)                                                                                      |
| γ(°)                                    | 90                                                                                             |
| V(Å <sup>3</sup> )                      | 2998.1(2)                                                                                      |
| Z                                       | 4                                                                                              |
| space group                             | P2 <sub>1</sub> /n                                                                             |
| d <sub>calcd</sub> (Mg/m <sup>3</sup> ) | 1.634                                                                                          |
| μ(mm <sup>-1</sup> )                    | 1.012                                                                                          |
| θ range(°)                              | 4.60 – 25.0                                                                                    |
| no. of indep.<br>reflections            | 5246                                                                                           |
| no. of parameters                       | 399                                                                                            |
| wR2 (all data) <sup>b</sup>             | 0.0699                                                                                         |
| R1 (I > 2σ(I)) <sup>b</sup>             | 0.0350                                                                                         |
| CCDC no. <sup>c</sup>                   | 855528                                                                                         |

<sup>a</sup>MoKα radiation (λ = 0.71073 Å). <sup>b</sup>R1 = Σ||F<sub>o</sub>| - |F<sub>c</sub>||/Σ|F<sub>o</sub>|; wR2=[w(F<sub>o</sub><sup>2</sup> - F<sub>c</sub><sup>2</sup>)/Σw(F<sub>o</sub><sup>2</sup>)]<sup>1/2</sup>. <sup>c</sup>Crystallographic data (excluding structure factors) have been deposited in the Cambridge Crystallographic Data Center. CIF files can be obtained from the CCDC free of charge via [http://www.ccdc.cam.ac.uk/data\\_request/cif](http://www.ccdc.cam.ac.uk/data_request/cif).

## IV.) Protein Crystallography

**PAK1 expression and purification.**<sup>[9]</sup> PAK1 kinase domain (residues 249 to 545, mutation Lys299Arg) was cloned into a pET-TOPO vector with an N-terminal 6-His tag and expressed in BL21(DE3) *E. coli* cells. The kinase domain contained the inactivating mutation Lys299Arg. Cells were grown at 37 °C until they reached an OD<sub>600</sub> of 0.6 and protein expression was induced by adding 1 mM IPTG and carried on for 6 hours at 28 °C. Cells were harvested and lysed by sonication in 50 mM HEPES pH 7.0, 500 mM NaCl and 5 mM DTT (lysis buffer). The lysate was cleared by centrifugation and applied to a Ni-NTA affinity column. The protein was eluted from the column with increasing concentration of imidazole in lysis buffer (20 mM to 250 mM) and treated overnight with TEV protease to cleave the His<sub>6</sub>-tag. The protein was further purified by passage through Mono-Q and a size-exclusion Superdex 200 column equilibrated with 20 mM Tris pH 8.0, 125 mM NaCl. Purified protein was concentrated to 9 mg/ml in a buffer containing 20 mM Tris pH 8.0, 125 mM NaCl and used for crystallization.

**Crystallization and data collections.** Crystals of apo-PAK1 were obtained using hanging drop vapor diffusion by mixing 1 µL of PAK1 (9 mg/ml) with 1 µL of crystallization solution (0.1 M HEPES pH 7.5, 1 M NaCl, 25% PEG 4000, 10 mM DTT) at 4°C. Crystals were subjected to soaking with 1 mM of the racemic complex **1** overnight. Crystals were cryoprotected, flash frozen in liquid nitrogen and yielded X-ray diffraction to 2.0 Å at The National Synchrotron Light Source, Brookhaven National Laboratory, X6A beam line. Collected data were integrated and scaled using the program HKL2000.<sup>[10]</sup>

**Structure determination and refinement.** The PAK1/inhibitor structure was solved by molecular replacement using the program PHASER<sup>[11]</sup> with the structure of PAK1 (249-545,



Lys299Arg) in complex with  $\Lambda$ -**FL172** (PDB code 3FXZ)<sup>[9]</sup> as a search model. Iterative cycles of refinement and manual rebuilding of the initial model were performed using the programs REFMAC5<sup>[12]</sup> and COOT<sup>[13]</sup>, respectively. Inhibitor models were manually fitted into calculated  $F_o-F_c$  maps. The validity of each step of refinement and rebuilding was monitored by the  $R_{work}$  and  $R_{free}$ . See Table S2 for data collection and refinement statistics. Coordinates of the structure have been deposited in the Protein Data Bank (PDB ID: 4DAW).

**Table S2.** Data collection and refinement statistics for the complex PAK1/1.

| <i>Data Collection</i>                         |                                                                            |
|------------------------------------------------|----------------------------------------------------------------------------|
| Space Group                                    | C222 <sub>1</sub>                                                          |
| Cell Dimension [ $\text{\AA}$ , $^\circ$ ]     | a = 51.676<br>b = 103.549<br>c = 122.790<br>$\alpha = \beta = \gamma = 90$ |
| Resolution [ $\text{\AA}$ ]                    | 50.0-2.0                                                                   |
| Reflections<br>total, unique                   | 166063, 22771                                                              |
| $R_{merge}$ <sup>a</sup>                       | 0.137 (0.587)                                                              |
| I/ $\sigma$                                    | 15.2 (3.4)                                                                 |
| Completeness [%]                               | 99.8 (98.5)                                                                |
| Redundancy                                     | 7.3 (7.2)                                                                  |
| <i>Refinement</i>                              |                                                                            |
| $R_{work}/R_{free}$ [%]                        | 20.3/ 23.8                                                                 |
| Ramachandran[%]<br>favoured/allowed/disallowed | 91.5/ 8.5/ 0                                                               |
| R.m.s.d. <sup>b</sup>                          |                                                                            |
| Bond lengths [ $\text{\AA}$ ]                  | 0.009                                                                      |
| Bond angles [ $^\circ$ ]                       | 1.373                                                                      |

<sup>a</sup>Data for highest resolution shell in parentheses. <sup>b</sup>R.m.s.d = root-mean-square-deviation.

## V.) Determination of IC<sub>50</sub>-Values

Various concentrations of the ruthenium complexes **1**, **5-7** or the ligand **4** were incubated at room temperature in 20 mM MOPS, 30 mM Mg(OAc)<sub>2</sub>, 0.8 μg/μL BSA, 5% DMSO (resulting from the inhibitor stock solution), pH 7.0 in the presence of substrate MBP (10 μM) and human PAK1 (2.9 nM). After 30 min, the reaction was initiated by adding ATP to a final concentration of 1 μM and approximately 0.1 μCi/μL [<sup>33</sup>P]ATP. Reactions were performed in a total volume of 25 μL. After 45 min, the reaction was terminated by spotting 15 μL on a circular P81 phosphocellulose paper (2.1 cm diameter, Whatman), followed by washing three times with 0.75% phosphoric acid and once with acetone. The dried P81 papers were transferred to a scintillation vial, 5 mL of scintillation cocktail was added, the counts per minute (CPM) were measured with a Beckmann Coulter™ LS6500 Multi-Purpose Scintillation Counter and corrected by the background CPM. The IC<sub>50</sub> values were determined in triplicate from sigmoidal curve fits.

## VI.) Supplementary Kinase Selectivity Data

The protein kinase selectivity profile of racemic complex **1** at an assay concentration of 10  $\mu$ M was derived from an active-site-directed affinity screening against 442 protein kinases (KINOMEscan, DiscoverX).<sup>[14]</sup>

**Table S3.** KINOMEscan Binding Data for Complex **1** (10  $\mu$ M).

| Ambit Gene Symbol             | Entrez Gene Symbol | Percent Control |
|-------------------------------|--------------------|-----------------|
| AAK1                          | AAK1               | 91              |
| ABL1(E255K)-phosphorylated    | ABL1               | 16              |
| ABL1(F317I)-nonphosphorylated | ABL1               | 100             |
| ABL1(F317I)-phosphorylated    | ABL1               | 71              |
| ABL1(F317L)-nonphosphorylated | ABL1               | 48              |
| ABL1(F317L)-phosphorylated    | ABL1               | 23              |
| ABL1(H396P)-nonphosphorylated | ABL1               | 3.3             |
| ABL1(H396P)-phosphorylated    | ABL1               | 27              |
| ABL1(M351T)-phosphorylated    | ABL1               | 28              |
| ABL1(Q252H)-nonphosphorylated | ABL1               | 13              |
| ABL1(Q252H)-phosphorylated    | ABL1               | 54              |
| ABL1(T315I)-nonphosphorylated | ABL1               | 3.1             |
| ABL1(T315I)-phosphorylated    | ABL1               | 1.6             |
| ABL1(Y253F)-phosphorylated    | ABL1               | 40              |
| ABL1-nonphosphorylated        | ABL1               | 27              |
| ABL1-phosphorylated           | ABL1               | 35              |
| ABL2                          | ABL2               | 67              |
| ACVR1                         | ACVR1              | 100             |
| ACVR1B                        | ACVR1B             | 95              |
| ACVR2A                        | ACVR2A             | 100             |
| ACVR2B                        | ACVR2B             | 93              |
| ACVRL1                        | ACVRL1             | 100             |
| ADCK3                         | CABC1              | 88              |

|             |        |     |
|-------------|--------|-----|
| ADCK4       | ADCK4  | 90  |
| AKT1        | AKT1   | 0.7 |
| AKT2        | AKT2   | 35  |
| AKT3        | AKT3   | 8.7 |
| ALK         | ALK    | 30  |
| AMPK-alpha1 | PRKAA1 | 1.4 |
| AMPK-alpha2 | PRKAA2 | 7.4 |
| ANKK1       | ANKK1  | 100 |
| ARK5        | NUAK1  | 16  |
| ASK1        | MAP3K5 | 100 |
| ASK2        | MAP3K6 | 63  |
| AURKA       | AURKA  | 23  |
| AURKB       | AURKB  | 16  |
| AURKC       | AURKC  | 31  |
| AXL         | AXL    | 8.3 |
| BIKE        | BMP2K  | 62  |
| BLK         | BLK    | 1.2 |
| BMPR1A      | BMPR1A | 98  |
| BMPR1B      | BMPR1B | 100 |
| BMPR2       | BMPR2  | 15  |
| BMX         | BMX    | 76  |
| BRAF        | BRAF   | 100 |
| BRAF(V600E) | BRAF   | 100 |
| BRK         | PTK6   | 100 |
| BRSK1       | BRSK1  | 100 |
| BRSK2       | BRSK2  | 100 |
| BTK         | BTK    | 0.1 |
| CAMK1       | CAMK1  | 41  |
| CAMK1D      | CAMK1D | 2.3 |
| CAMK1G      | CAMK1G | 45  |
| CAMK2A      | CAMK2A | 30  |
| CAMK2B      | CAMK2B | 35  |
| CAMK2D      | CAMK2D | 65  |
| CAMK2G      | CAMK2G | 43  |

|               |          |      |
|---------------|----------|------|
| CAMK4         | CAMK4    | 1.3  |
| CAMKK1        | CAMKK1   | 0.9  |
| CAMKK2        | CAMKK2   | 0.95 |
| CASK          | CASK     | 100  |
| CDC2L1        | CDC2L1   | 100  |
| CDC2L2        | CDC2L2   | 100  |
| CDC2L5        | CDC2L5   | 100  |
| CDK11         | CDC2L6   | 98   |
| CDK2          | CDK2     | 32   |
| CDK3          | CDK3     | 72   |
| CDK4-cyclinD1 | CDK4     | 100  |
| CDK4-cyclinD3 | CDK4     | 99   |
| CDK5          | CDK5     | 100  |
| CDK7          | CDK7     | 7    |
| CDK8          | CDK8     | 100  |
| CDK9          | CDK9     | 100  |
| CDKL1         | CDKL1    | 100  |
| CDKL2         | CDKL2    | 100  |
| CDKL3         | CDKL3    | 100  |
| CDKL5         | CDKL5    | 100  |
| CHEK1         | CHEK1    | 41   |
| CHEK2         | CHEK2    | 2    |
| CIT           | CIT      | 100  |
| CLK1          | CLK1     | 38   |
| CLK2          | CLK2     | 1.4  |
| CLK3          | CLK3     | 5.2  |
| CLK4          | CLK4     | 84   |
| CSF1R         | CSF1R    | 71   |
| CSK           | CSK      | 77   |
| CSNK1A1       | CSNK1A1  | 100  |
| CSNK1A1L      | CSNK1A1L | 100  |
| CSNK1D        | CSNK1D   | 100  |
| CSNK1E        | CSNK1E   | 92   |
| CSNK1G1       | CSNK1G1  | 100  |

|                           |          |     |
|---------------------------|----------|-----|
| CSNK1G2                   | CSNK1G2  | 100 |
| CSNK1G3                   | CSNK1G3  | 100 |
| CSNK2A1                   | CSNK2A1  | 98  |
| CSNK2A2                   | CSNK2A2  | 80  |
| CTK                       | MATK     | 93  |
| DAPK1                     | DAPK1    | 61  |
| DAPK2                     | DAPK2    | 76  |
| DAPK3                     | DAPK3    | 68  |
| DCAMKL1                   | DCLK1    | 7.8 |
| DCAMKL2                   | DCLK2    | 4   |
| DCAMKL3                   | DCLK3    | 25  |
| DDR1                      | DDR1     | 53  |
| DDR2                      | DDR2     | 53  |
| DLK                       | MAP3K12  | 54  |
| DMPK                      | DMPK     | 73  |
| DMPK2                     | CDC42BPG | 60  |
| DRAK1                     | STK17A   | 100 |
| DRAK2                     | STK17B   | 100 |
| DYRK1A                    | DYRK1A   | 82  |
| DYRK1B                    | DYRK1B   | 82  |
| DYRK2                     | DYRK2    | 100 |
| EGFR                      | EGFR     | 100 |
| EGFR(E746-A750del)        | EGFR     | 100 |
| EGFR(G719C)               | EGFR     | 100 |
| EGFR(G719S)               | EGFR     | 100 |
| EGFR(L747-E749del, A750P) | EGFR     | 92  |
| EGFR(L747-S752del, P753S) | EGFR     | 100 |
| EGFR(L747-T751del,Sins)   | EGFR     | 100 |
| EGFR(L858R)               | EGFR     | 100 |
| EGFR(L858R,T790M)         | EGFR     | 65  |
| EGFR(L861Q)               | EGFR     | 84  |
| EGFR(S752-I759del)        | EGFR     | 100 |
| EGFR(T790M)               | EGFR     | 24  |
| EIF2AK1                   | EIF2AK1  | 100 |

|              |        |     |
|--------------|--------|-----|
| EPHA1        | EPHA1  | 100 |
| EPHA2        | EPHA2  | 93  |
| EPHA3        | EPHA3  | 29  |
| EPHA4        | EPHA4  | 79  |
| EPHA5        | EPHA5  | 94  |
| EPHA6        | EPHA6  | 74  |
| EPHA7        | EPHA7  | 89  |
| EPHA8        | EPHA8  | 65  |
| EPHB1        | EPHB1  | 100 |
| EPHB2        | EPHB2  | 100 |
| EPHB3        | EPHB3  | 84  |
| EPHB4        | EPHB4  | 100 |
| EPHB6        | EPHB6  | 76  |
| ERBB2        | ERBB2  | 84  |
| ERBB3        | ERBB3  | 100 |
| ERBB4        | ERBB4  | 95  |
| ERK1         | MAPK3  | 15  |
| ERK2         | MAPK1  | 19  |
| ERK3         | MAPK6  | 95  |
| ERK4         | MAPK4  | 100 |
| ERK5         | MAPK7  | 2.5 |
| ERK8         | MAPK15 | 49  |
| ERN1         | ERN1   | 64  |
| FAK          | PTK2   | 8.5 |
| FER          | FER    | 2.9 |
| FES          | FES    | 54  |
| FGFR1        | FGFR1  | 12  |
| FGFR2        | FGFR2  | 30  |
| FGFR3        | FGFR3  | 47  |
| FGFR3(G697C) | FGFR3  | 54  |
| FGFR4        | FGFR4  | 29  |
| FGR          | FGR    | 24  |
| FLT1         | FLT1   | 86  |
| FLT3         | FLT3   | 29  |

|                       |         |     |
|-----------------------|---------|-----|
| FLT3(D835H)           | FLT3    | 12  |
| FLT3(D835Y)           | FLT3    | 50  |
| FLT3(ITD)             | FLT3    | 44  |
| FLT3(K663Q)           | FLT3    | 12  |
| FLT3(N841I)           | FLT3    | 2.7 |
| FLT3(R834Q)           | FLT3    | 18  |
| FLT4                  | FLT4    | 66  |
| FRK                   | FRK     | 36  |
| FYN                   | FYN     | 23  |
| GAK                   | GAK     | 5.6 |
| GCN2(Kin.Dom.2,S808G) | EIF2AK4 | 98  |
| GRK1                  | GRK1    | 1.6 |
| GRK4                  | GRK4    | 100 |
| GRK7                  | GRK7    | 1   |
| GSK3A                 | GSK3A   | 3.6 |
| GSK3B                 | GSK3B   | 1.2 |
| HCK                   | HCK     | 22  |
| HIPK1                 | HIPK1   | 88  |
| HIPK2                 | HIPK2   | 45  |
| HIPK3                 | HIPK3   | 65  |
| HIPK4                 | HIPK4   | 100 |
| HPK1                  | MAP4K1  | 38  |
| HUNK                  | HUNK    | 100 |
| ICK                   | ICK     | 4.9 |
| IGF1R                 | IGF1R   | 16  |
| IKK-alpha             | CHUK    | 100 |
| IKK-beta              | IKBKB   | 100 |
| IKK-epsilon           | IKBKE   | 100 |
| INSR                  | INSR    | 11  |
| INSRR                 | INSRR   | 26  |
| IRAK1                 | IRAK1   | 78  |
| IRAK3                 | IRAK3   | 51  |
| IRAK4                 | IRAK4   | 1.3 |
| ITK                   | ITK     | 14  |



|                              |         |     |
|------------------------------|---------|-----|
| JAK1(JH1domain-catalytic)    | JAK1    | 95  |
| JAK1(JH2domain-pseudokinase) | JAK1    | 73  |
| JAK2(JH1domain-catalytic)    | JAK2    | 31  |
| JAK3(JH1domain-catalytic)    | JAK3    | 4.8 |
| JNK1                         | MAPK8   | 100 |
| JNK2                         | MAPK9   | 100 |
| JNK3                         | MAPK10  | 75  |
| KIT                          | KIT     | 64  |
| KIT(A829P)                   | KIT     | 63  |
| KIT(D816H)                   | KIT     | 92  |
| KIT(D816V)                   | KIT     | 73  |
| KIT(L576P)                   | KIT     | 42  |
| KIT(V559D)                   | KIT     | 62  |
| KIT(V559D,T670I)             | KIT     | 87  |
| KIT(V559D,V654A)             | KIT     | 87  |
| LATS1                        | LATS1   | 74  |
| LATS2                        | LATS2   | 7.4 |
| LCK                          | LCK     | 3.8 |
| LIMK1                        | LIMK1   | 92  |
| LIMK2                        | LIMK2   | 100 |
| LKB1                         | STK11   | 81  |
| LOK                          | STK10   | 65  |
| LRRK2                        | LRRK2   | 100 |
| LRRK2(G2019S)                | LRRK2   | 78  |
| LTK                          | LTK     | 5.8 |
| LYN                          | LYN     | 49  |
| LZK                          | MAP3K13 | 46  |
| MAK                          | MAK     | 100 |
| MAP3K1                       | MAP3K1  | 71  |
| MAP3K15                      | MAP3K15 | 100 |
| MAP3K2                       | MAP3K2  | 28  |
| MAP3K3                       | MAP3K3  | 17  |
| MAP3K4                       | MAP3K4  | 100 |
| MAP4K2                       | MAP4K2  | 100 |

|             |          |      |
|-------------|----------|------|
| MAP4K3      | MAP4K3   | 0.85 |
| MAP4K4      | MAP4K4   | 76   |
| MAP4K5      | MAP4K5   | 9    |
| MAPKAPK2    | MAPKAPK2 | 100  |
| MAPKAPK5    | MAPKAPK5 | 100  |
| MARK1       | MARK1    | 42   |
| MARK2       | MARK2    | 4.8  |
| MARK3       | MARK3    | 24   |
| MARK4       | MARK4    | 47   |
| MAST1       | MAST1    | 81   |
| MEK1        | MAP2K1   | 5.2  |
| MEK2        | MAP2K2   | 10   |
| MEK3        | MAP2K3   | 0    |
| MEK4        | MAP2K4   | 5.8  |
| MEK5        | MAP2K5   | 5.8  |
| MEK6        | MAP2K6   | 85   |
| MELK        | MELK     | 100  |
| MERTK       | MERTK    | 5.4  |
| MET         | MET      | 33   |
| MET(M1250T) | MET      | 16   |
| MET(Y1235D) | MET      | 31   |
| MINK        | MINK1    | 12   |
| MKK7        | MAP2K7   | 14   |
| MKNK1       | MKNK1    | 100  |
| MKNK2       | MKNK2    | 0.6  |
| MLCK        | MYLK3    | 99   |
| MLK1        | MAP3K9   | 29   |
| MLK2        | MAP3K10  | 66   |
| MLK3        | MAP3K11  | 26   |
| MRCKA       | CDC42BPA | 78   |
| MRCKB       | CDC42BPB | 46   |
| MST1        | STK4     | 4.9  |
| MST1R       | MST1R    | 64   |
| MST2        | STK3     | 50   |

|           |          |      |
|-----------|----------|------|
| MST3      | STK24    | 3    |
| MST4      | MST4     | 0.2  |
| MTOR      | FRAP1    | 100  |
| MUSK      | MUSK     | 100  |
| MYLK      | MYLK     | 15   |
| MYLK2     | MYLK2    | 100  |
| MYLK4     | MYLK4    | 85   |
| MYO3A     | MYO3A    | 2.1  |
| MYO3B     | MYO3B    | 23   |
| NDR1      | STK38    | 7.8  |
| NDR2      | STK38L   | 14   |
| NEK1      | NEK1     | 74   |
| NEK11     | NEK11    | 100  |
| NEK2      | NEK2     | 63   |
| NEK3      | NEK3     | 56   |
| NEK4      | NEK4     | 100  |
| NEK5      | NEK5     | 95   |
| NEK6      | NEK6     | 100  |
| NEK7      | NEK7     | 100  |
| NEK9      | NEK9     | 100  |
| NIM1      | MGC42105 | 100  |
| NLK       | NLK      | 77   |
| OSR1      | OXSRI    | 30   |
| p38-alpha | MAPK14   | 99   |
| p38-beta  | MAPK11   | 72   |
| p38-delta | MAPK13   | 54   |
| p38-gamma | MAPK12   | 70   |
| PAK1      | PAK1     | 0.8  |
| PAK2      | PAK2     | 12   |
| PAK3      | PAK3     | 25   |
| PAK4      | PAK4     | 14   |
| PAK6      | PAK6     | 13   |
| PAK7      | PAK7     | 0.55 |
| PCTK1     | PCTK1    | 17   |

|                       |             |     |
|-----------------------|-------------|-----|
| PCTK2                 | PCTK2       | 52  |
| PCTK3                 | PCTK3       | 100 |
| PDGFRA                | PDGFRA      | 79  |
| PDGFRB                | PDGFRB      | 39  |
| PDPK1                 | PDPK1       | 62  |
| PFCDPK1(P.falciparum) | PFB0815w    | 100 |
| PFPK5(P.falciparum)   | MAL13P1.279 | 37  |
| PFTAIRE2              | PFTK2       | 4.4 |
| PFTK1                 | PFTK1       | 39  |
| PHKG1                 | PHKG1       | 75  |
| PHKG2                 | PHKG2       | 7.8 |
| PIK3C2B               | PIK3C2B     | 100 |
| PIK3C2G               | PIK3C2G     | 100 |
| PIK3CA                | PIK3CA      | 100 |
| PIK3CA(C420R)         | PIK3CA      | 100 |
| PIK3CA(E542K)         | PIK3CA      | 97  |
| PIK3CA(E545A)         | PIK3CA      | 88  |
| PIK3CA(E545K)         | PIK3CA      | 100 |
| PIK3CA(H1047L)        | PIK3CA      | 100 |
| PIK3CA(H1047Y)        | PIK3CA      | 100 |
| PIK3CA(I800L)         | PIK3CA      | 73  |
| PIK3CA(M1043I)        | PIK3CA      | 100 |
| PIK3CA(Q546K)         | PIK3CA      | 100 |
| PIK3CB                | PIK3CB      | 84  |
| PIK3CD                | PIK3CD      | 93  |
| PIK3CG                | PIK3CG      | 77  |
| PIK4CB                | PI4KB       | 4.7 |
| PIM1                  | PIM1        | 22  |
| PIM2                  | PIM2        | 79  |
| PIM3                  | PIM3        | 39  |
| PIP5K1A               | PIP5K1A     | 100 |
| PIP5K1C               | PIP5K1C     | 49  |
| PIP5K2B               | PIP4K2B     | 100 |
| PIP5K2C               | PIP4K2C     | 100 |

|                      |          |      |
|----------------------|----------|------|
| PKAC-alpha           | PRKACA   | 1.4  |
| PKAC-beta            | PRKACB   | 2    |
| PKMYT1               | PKMYT1   | 58   |
| PKN1                 | PKN1     | 4.3  |
| PKN2                 | PKN2     | 35   |
| PKNB(M.tuberculosis) | pknB     | 38   |
| PLK1                 | PLK1     | 97   |
| PLK2                 | PLK2     | 100  |
| PLK3                 | PLK3     | 72   |
| PLK4                 | PLK4     | 0.95 |
| PRKCD                | PRKCD    | 85   |
| PRKCE                | PRKCE    | 4.4  |
| PRKCH                | PRKCH    | 40   |
| PRKCI                | PRKCI    | 31   |
| PRKCQ                | PRKCQ    | 1    |
| PRKD1                | PRKD1    | 58   |
| PRKD2                | PRKD2    | 67   |
| PRKD3                | PRKD3    | 25   |
| PRKG1                | PRKG1    | 53   |
| PRKG2                | PRKG2    | 100  |
| PRKR                 | EIF2AK2  | 58   |
| PRKX                 | PRKX     | 21   |
| PRP4                 | PRPF4B   | 100  |
| PYK2                 | PTK2B    | 32   |
| QSK                  | KIAA0999 | 100  |
| RAF1                 | RAF1     | 77   |
| RET                  | RET      | 2.4  |
| RET(M918T)           | RET      | 2    |
| RET(V804L)           | RET      | 4.8  |
| RET(V804M)           | RET      | 6.9  |
| RIOK1                | RIOK1    | 65   |
| RIOK2                | RIOK2    | 100  |
| RIOK3                | RIOK3    | 98   |
| RIPK1                | RIPK1    | 100  |

|                               |         |     |
|-------------------------------|---------|-----|
| RIPK2                         | RIPK2   | 100 |
| RIPK4                         | RIPK4   | 100 |
| RIPK5                         | DSTKY   | 5.4 |
| ROCK1                         | ROCK1   | 1.4 |
| ROCK2                         | ROCK2   | 3.6 |
| ROS1                          | ROS1    | 90  |
| RPS6KA4(Kin.Dom.1-N-terminal) | RPS6KA4 | 2.8 |
| RPS6KA4(Kin.Dom.2-C-terminal) | RPS6KA4 | 100 |
| RPS6KA5(Kin.Dom.1-N-terminal) | RPS6KA5 | 17  |
| RPS6KA5(Kin.Dom.2-C-terminal) | RPS6KA5 | 100 |
| RSK1(Kin.Dom.1-N-terminal)    | RPS6KA1 | 7.2 |
| RSK1(Kin.Dom.2-C-terminal)    | RPS6KA1 | 3.9 |
| RSK2(Kin.Dom.1-N-terminal)    | RPS6KA3 | 0.3 |
| RSK3(Kin.Dom.1-N-terminal)    | RPS6KA2 | 4.4 |
| RSK3(Kin.Dom.2-C-terminal)    | RPS6KA2 | 51  |
| RSK4(Kin.Dom.1-N-terminal)    | RPS6KA6 | 3   |
| RSK4(Kin.Dom.2-C-terminal)    | RPS6KA6 | 14  |
| S6K1                          | RPS6KB1 | 11  |
| SBK1                          | SBK1    | 100 |
| SgK110                        | SgK110  | 100 |
| SGK3                          | SGK3    | 44  |
| SIK                           | SIK1    | 29  |
| SIK2                          | SIK2    | 66  |
| SLK                           | SLK     | 34  |
| SNARK                         | NUAK2   | 13  |
| SNRK                          | SNRK    | 100 |
| SRC                           | SRC     | 2   |
| SRMS                          | SRMS    | 60  |
| SRPK1                         | SRPK1   | 100 |
| SRPK2                         | SRPK2   | 100 |
| SRPK3                         | SRPK3   | 100 |
| STK16                         | STK16   | 60  |
| STK33                         | STK33   | 9   |
| STK35                         | STK35   | 36  |

|                              |        |      |
|------------------------------|--------|------|
| STK36                        | STK36  | 84   |
| STK39                        | STK39  | 98   |
| SYK                          | SYK    | 100  |
| TAK1                         | MAP3K7 | 69   |
| TAOK1                        | TAOK1  | 11   |
| TAOK2                        | TAOK2  | 76   |
| TAOK3                        | TAOK3  | 60   |
| TBK1                         | TBK1   | 45   |
| TEC                          | TEC    | 19   |
| TESK1                        | TESK1  | 100  |
| TGFBR1                       | TGFBR1 | 100  |
| TGFBR2                       | TGFBR2 | 100  |
| TIE1                         | TIE1   | 46   |
| TIE2                         | TEK    | 51   |
| TLK1                         | TLK1   | 31   |
| TLK2                         | TLK2   | 81   |
| TNIK                         | TNIK   | 12   |
| TNK1                         | TNK1   | 56   |
| TNK2                         | TNK2   | 50   |
| TNNI3K                       | TNNI3K | 86   |
| TRKA                         | NTRK1  | 0.25 |
| TRKB                         | NTRK2  | 1.4  |
| TRKC                         | NTRK3  | 2.3  |
| TRPM6                        | TRPM6  | 75   |
| TSSK1B                       | TSSK1B | 100  |
| TTK                          | TTK    | 64   |
| TXK                          | TXK    | 90   |
| TYK2(JH1domain-catalytic)    | TYK2   | 9.4  |
| TYK2(JH2domain-pseudokinase) | TYK2   | 100  |
| TYRO3                        | TYRO3  | 84   |
| ULK1                         | ULK1   | 11   |
| ULK2                         | ULK2   | 4.3  |
| ULK3                         | ULK3   | 0.3  |
| VEGFR2                       | KDR    | 69   |

|       |        |      |
|-------|--------|------|
| VRK2  | VRK2   | 0.75 |
| WEE1  | WEE1   | 100  |
| WEE2  | WEE2   | 67   |
| YANK1 | STK32A | 21   |
| YANK2 | STK32B | 44   |
| YANK3 | STK32C | 65   |
| YES   | YES1   | 13   |
| YSK1  | STK25  | 28   |
| YSK4  | YSK4   | 52   |
| ZAK   | ZAK    | 100  |
| ZAP70 | ZAP70  | 85   |

---



## Literature:

- [1] M. Lin, X. Xu, J. Wang, N. Chen, J. Huang, *Chin. J. Synth. Chem.* **2005**, *13*, 169-171.
- [2] A. G. Wenzel, E. Jacobsen, *J. Am. Chem. Soc.* **2002**, *124*, 12964-12965.
- [3] C. Brotschi, G. Mathis, C. J. Leumann, *Chem. Eur. J.* **2005**, *11*, 1911-1923.
- [4] M. Ranger, D. Rondeau, M. Leclerc, *Macromolecules* **1997**, *30*, 7686-7691.
- [5] C. Landgrafe, W. S. Sheldrick, *Dalton Trans.* **1994**, 1885-1893.
- [6] *X-Area, Version 1.54*, STOE & Cie GmbH, **2009**.
- [7] A. Altomare, G. Cascarano, C. Giacovazzo, A. Guagliardi, *J. Appl. Crystallogr.* **1993**, *26*, 343-350.
- [8] G. M. Sheldrick, *Acta Crystallogr., Sect. A* **2008**, *64*, 112.
- [9] J. Maksimoska, L. Feng, K. Harms, Y. Chunling, J. Kissil, R. Marmorstein, E. Meggers, *J. Am. Chem. Soc.* **2008**, *130*, 15764-15765.
- [10] Z. Otwinowski, W. Minor, *Methods Enzymol.* **1997**, *276*, 307-326.
- [11] A. J. McCoy, R. W. Grosse-Kunstleve, L. C. Storoni, R. J. Read, *Acta Cryst.* **2005**, *D61*, 458-464.
- [12] G. N. Murshudov, A. A. Vagin, E. J. Dodson, *Acta Crystallogr. Sect. D* **1997**, *53*, 240-255.
- [13] P. Emsley, K. Cowtan, *Acta Crystallogr. Sect. D: Biol. Crystallogr.* **2004**, *60*, 2126-2132.
- [14] a.) M. A. Fabian, W. H. Biggs III, D. K. Treiber, C. E. Atteridge, M. D. Azimoara, M. G. Benedetti, T. A. Carter, P. Ciceri, P. T. Edeen, M. Floyd, J. M. Ford, M. Galvin, J. L. Gerlach, R. M. Grotzfeld, S. Herrgard, D. E. Insko, A. G. Lai, J.-M. Lélias, S. A. Mehta, Z. V. Milanov, A. M. Velasco, L. M. Wodicka, H. K. Patel, P. P. Zarrinkar, D. J. Lockhardt, *Nat. Biotechnol.* **2005**, *23*, 329-336; b.) M. W. Karaman,

S. Herrgard, D. K. Treiber, P. Gallant, C. E. Atteridge, B. T. Campbell, K. W. Chan, P. Ciceri, M. I. Davis, P. T. Edeen, R. Faraoni, M. Floyd, J. P. Hunt, D. J. Lockhardt, Z. V. Milanov, M. J. Morrison, G. Pallares, H. K. Patel, S. Pritchard, L. M. Wodicka, P. P. Zarrinkar, *Nat. Biotechnol.* **2008**, *26*, 127-132.
